# Supplementary material
Source: HighWire-hosted journal article supplement (https://bmjopen.bmj.com/content/12/4/e051777)
Supplement: inline-supplementary-material-2 [file inline-supplementary-material-2.pdf]

| Authors                                                                       | Razdanet al. 1988 | Annoml et.al 1990 | Garcia, J 1994 | Jaillard, 1995 | Jha et. al 2002 | Niaz et al. 2003 | Mahajan et. al 2004 | Faeh et.al 2009 | Ezzati et.al 2011 | Dhiman et. al 2018 | Khattar et.al 2019 | Lu et.al 2020  | Burtscher et. al 2021 | Ortiz et.al 2021 | Liu et.al 2021 |
|-------------------------------------------------------------------------------|-------------------|-------------------|----------------|----------------|-----------------|------------------|---------------------|-----------------|-------------------|--------------------|--------------------|----------------|-----------------------|------------------|----------------|
| Did the review address a clearly focused question?                            | YES               | YES               | YES            | YES            | YES             | YES              | NO                  | YES             | NO                | YES                | YES                | YES            | YES                   | YES              | YES            |
| Did the authors look for the right type of papers?                            | CT                | NO                | CT             | CT             | YES             | CT               | CT                  | YES             | CT                | YES                | YES                | YES            | YES                   | YES              | YES            |
| Do you think all the important, relevant studies were included?               | Not applicable    | Not applicable    | Not applicable | Not applicable | Not applicable  | Not applicable   | Not applicable      | Not applicable  | Not applicable    | Not applicable     | Not applicable     | Not applicable | Not applicable        | Not applicable   | Not applicable |
| Did the review's authors do enough to assess quality of the included studies? | Not applicable    | Not applicable    | Not applicable | Not applicable | Not applicable  | Not applicable   | Not applicable      | Not applicable  | Not applicable    | Not applicable     | Not applicable     | Not applicable | Not applicable        | Not applicable   | Not applicable |
| If the results of the review have been combined, was it reasonable to do so?  | CT                | YES               | YES            | NO             | CT              | CT               | NO                  | CT              | NO                | CT                 | CT                 | CT             | CT                    | CT               | CT             |

|                                                             |     |    |     |     |     |     |     |     |     |     |     |     |     |     |     |
|-------------------------------------------------------------|-----|----|-----|-----|-----|-----|-----|-----|-----|-----|-----|-----|-----|-----|-----|
| <b>What are the overall results of the review?</b>          | YES | NO | YES | CT  | YES | YES | YES | YES | YES | YES | YES | YES | YES | YES | YES |
| <b>How precise are the results?</b>                         | NO  | NO | NO  | NO  | YES | NO  | NO  | NO  | NO  | YES | YES | YES | YES | YES | YES |
| <b>Can the results be applied to the local population ?</b> | YES | NO | NO  | YES | YES | YES | YES | YES | CT  | YES | YES | YES | YES | YES | YES |
| <b>Were all important outcomes considered ?</b>             | YES | CT | NO  | YES | YES | YES | YES | NO  | YES | YES | YES | YES | YES | YES | YES |
| <b>Are the benefits worth the harms and costs?</b>          | CT  | NO | CT  | CT  | YES | YES | CT  | CT  | CT  | YES | YES | YES | YES | YES | YES |

Supplementary Table 1 CASP analysis of the selected literature
